# Supplementary material for: ORMDL3 restrains type I interferon signaling and anti-tumor immunity by promoting RIG-I degradation
Source: eLife. 2025 Mar 24;13:RP101973. doi: 10.7554/eLife.101973 (PMC11932694; doi:10.7554/eLife.101973)
Supplement: Supplementary file 1. — Related to Materials and methods. [file elife-101973-supp1.xlsx]

## Sheet: Sheet1
	Supplementary Table 1. Primers for qPCR. Related to Materials and Methods.
	Gene name	Primer sequences (from 5’ to 3’)
	human qPCR sequence
	18S Forward	GTAACCCGTTGAACCCCATT
	18S Reverse	CCATCCAATCGGTAGTAGCG
	IFNB1 Forward	GTCAGAGTGGAAATCCTAAG
	IFNB1 Reverse	ACAGCATCTGCTGGTTGAAG
	CCL5 Forward	ATCCTCATTGCTACTGCCCTC
	CCL5 Reverse	GCCACTGGTGTAGAAATACTCC
	CXCL10 Forward	GCTCTACTGAGGTGCTATGTTC
	CXCL10 Reverse	GGAGGATGGCAGTGGAAGTC
	ISG54 Forward	GGAGGGAGAAAACTCCTTGGA
	ISG54 Reverse	GGCCAGTAGGTTGCACATTGT
	ISG56 Forward	TCAGGTCAAGGATAGTCTGGAG
	ISG56 Reverse	AGGTTGTGTATTCCCACACTGTA
	TNF Forward	AGTGAAGTGCTGGCAACCAC
	TNF Reverse	GAGGAAGGCCTAAGGTCCAC
	IL6 Forward	GCCTTCTTGGGACTGATGCT
	IL6 Reverse	CTGCAAGTGCATCATCGTTGT
	ORMDL1 Forward	TGACCAGGGTAAAGCAAGGC
	ORMDL1 Reverse	CCGAACACCATGTAGTTGTGG
	ORMDL2 Forward	GTGGCACACAGCGAAGTAAAC
	ORMDL2 Reverse	TGCAGCAATCCTACCAAGATG
	ORMDL3 Forward	AACACGCGGGTGATGAACAG
	ORMDL3 Reverse	AGGGACACTCACAAACGGGA
	RIG-I Forward	CTGCAAGCCTTCCAGGATTATAT
	RIG-I Reverse	TCTGATCTGAGAAGGCATTCCA
	ORMDL3 SNP sequence Forward	GCGACAGCGAGACTCCATCTCC
	ORMDL3 SNP sequence Reverse	TCAGAACCAAGGCCCTTATTAG
	USP10 Forward	CCCTCTCCTGGAATAGGGCA
	USP10 Reverse	TCTCGGCAAAGTGTCACTGG
	mouse qPCR sequence
	β-Actin Forward	AGTGTGACGTTGACATCCGT
	β-Actin Reverse	GCAGCTCAGTAACAGTCCGC
	Ifnb1 Forward	ATGAGTGGTGGTTGCAGGC
	Ifnb1 Reverse	TGACCTTTCAAATGCAGTAGATTCA
	Ccl5 Forward	AGGACTCTGAGACAGCACAT
	Ccl5 Reverse	GCAGTGAGGATGATGGTGAG
	Cxcl10 Forward	TCAGGCTCGTCAGTTCTAAGTT
	Cxcl10 Reverse	GATGGTGGTTAAGTTCGTGCTT
	Il6 Forward	TAGTCCTTCCTACCCCAATTTCC
	Il6 Reverse	TTGGTCCTTAGCCACTCCTTC
	Tnf Forward	AAGCCTGTAGCCCACGTCGT
	Tnf Reverse	GGCACCACTAGTTGGTTGTCTT
	Ormdl3 Forward	CCAACCTTATCCACAACCTGG
	Ormdl3 Reverse	GACCCCGTAGTCCATCTGC
